# Supplementary material for: LncRNA SNHG9 is a prognostic biomarker and correlated with immune infiltrates in prostate cancer
Source: PubMed Central journal article supplement — Transl Androl Urol. 2021 Jan;10(1):215–26. doi: 10.21037/tau-20-1134 (PMC7844523; doi:10.21037/tau-20-1134), 2021-01
Supplement: tau-10-01-215-supplementary.pdf [file tau-10-01-215-supplementary.pdf]

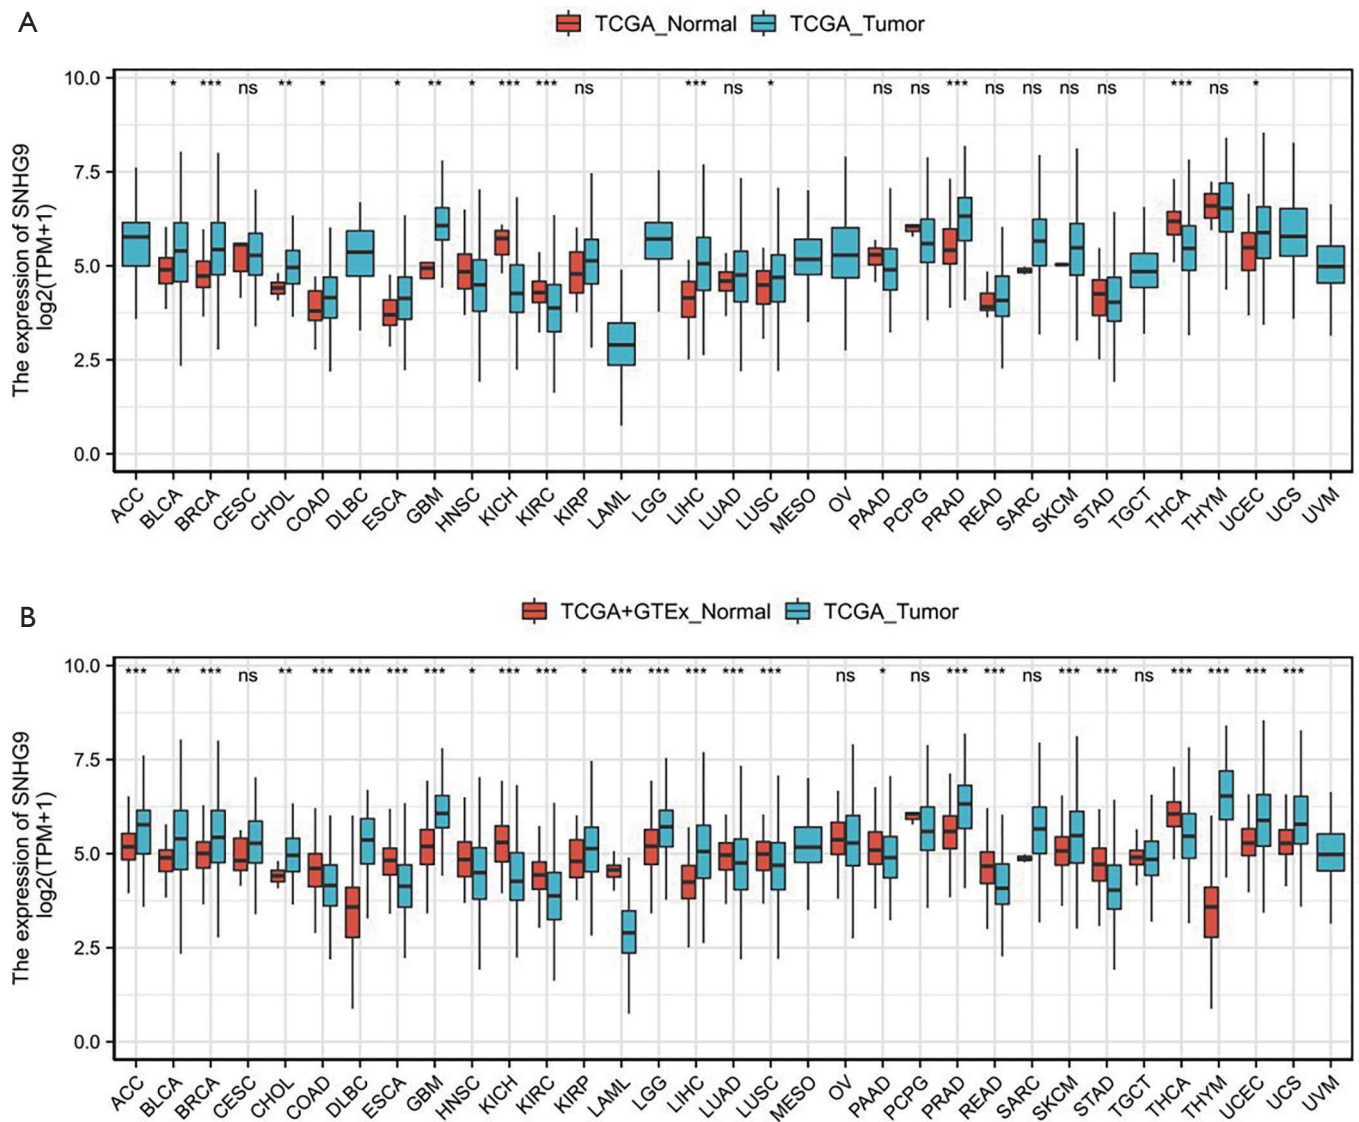

**Figure S1** (A) Wilcoxon rank sum test was used to analyze the difference expression of SNHG9 in normal and tumor samples of TCGA. (B) Wilcoxon rank sum test was used to analyze the difference expression of SNHG9 in normal samples of GTEx combined with TCGA and tumor samples of TCGA. ns,  $p \geq 0.05$ ; \*,  $p < 0.05$ ; \*\*,  $p < 0.01$ ; \*\*\*,  $p < 0.001$ .



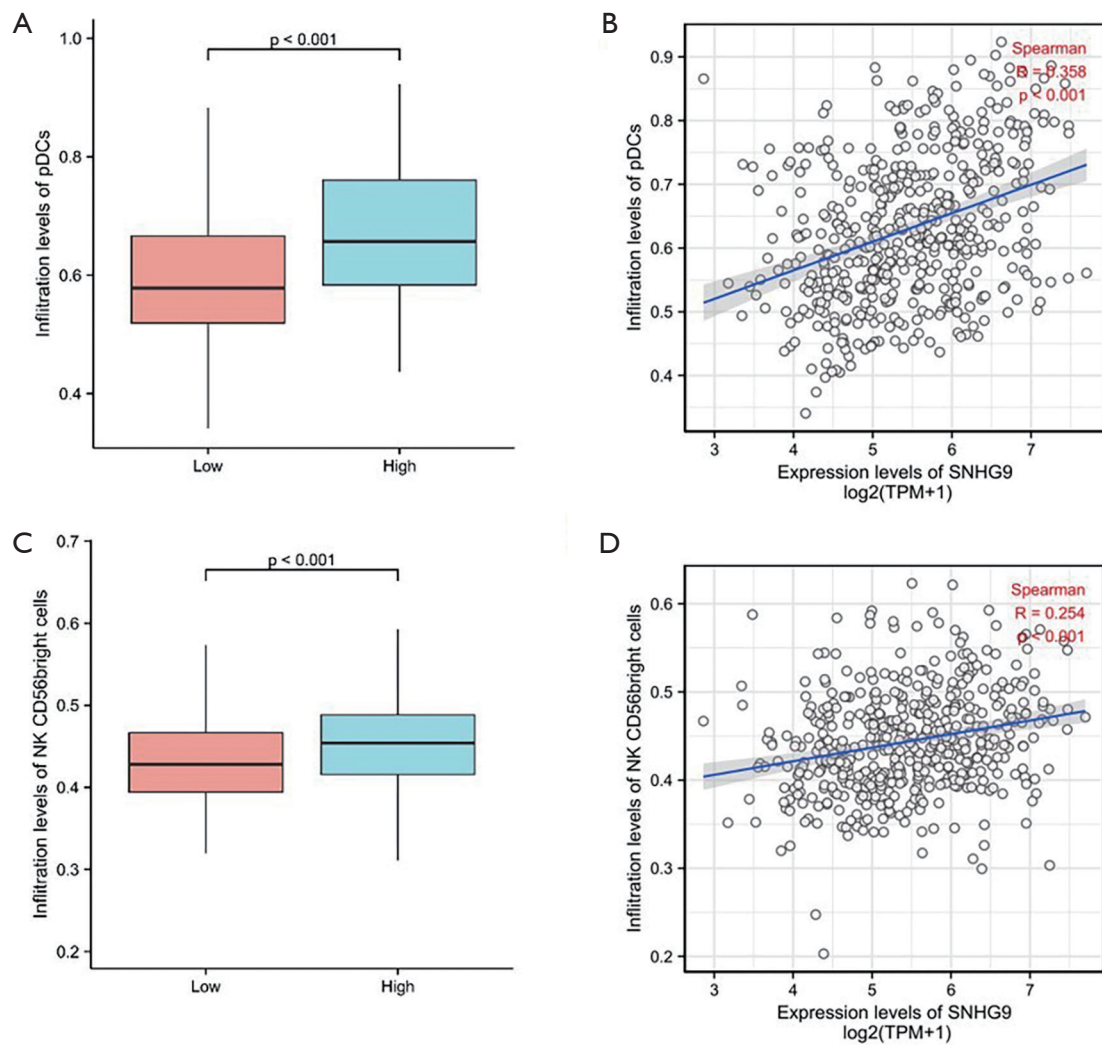

**Figure S3** The Wilcoxon rank sum test was used to analyze the difference of pDCs infiltration level between SNHG9 high and low expression groups (A), and the correlation between SNHG9 expression and pDCs was detected by Spearman correlation method (B). The Wilcoxon rank sum test was used to analyze the difference of NK CD56bright cells infiltration level between SNHG9 high and low expression groups (C), and the correlation between SNHG9 expression and NK CD56bright cells was detected by Spearman correlation method (D). NK, natural killer; pDCs, plasmacytoid dendritic cells.
